# Supplementary material
Source: HighWire-hosted journal article supplement (https://jnm.snmjournals.org/highwire/filestream/95123/field_highwire_adjunct_files/0/190231_Supplemental_Data.pdf)
Supplement: 190231_Supplemental_Data.pdf [file 190231_Supplemental_Data.pdf]

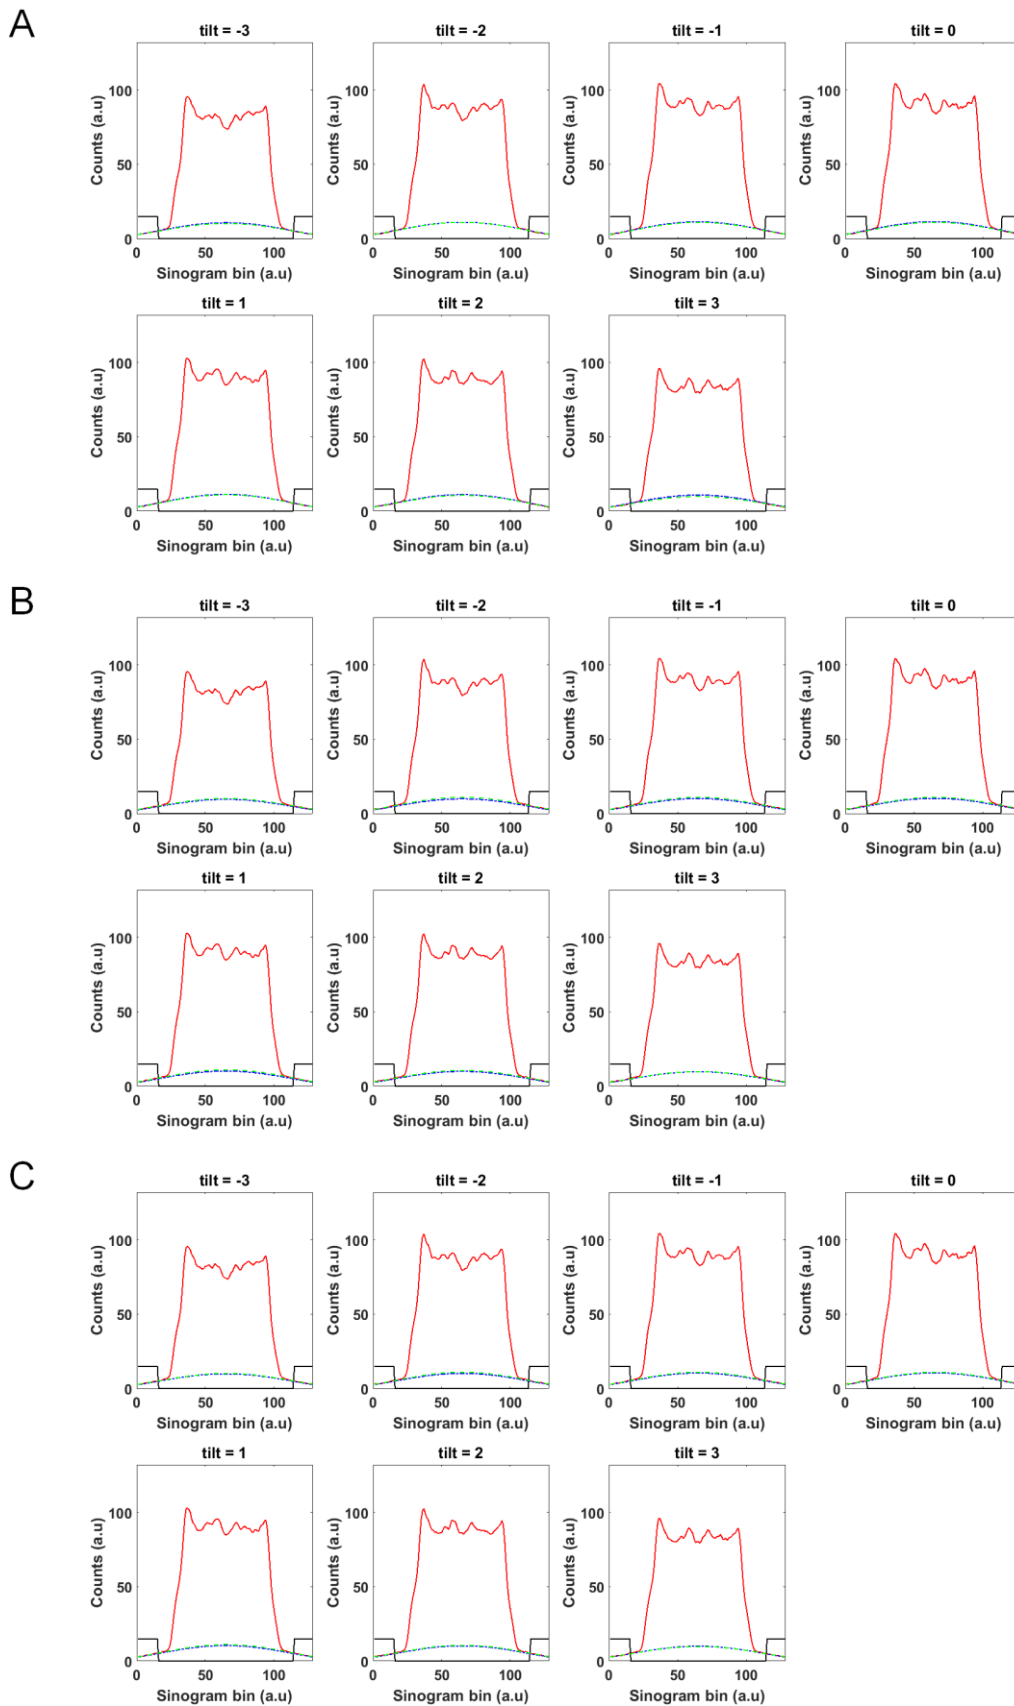

**SUPPLEMENTAL FIGURE 1.** Measured sinogram profiles of each individual tilt angle ( $N=7$ , from -3 to 3) when using CTAC and MRAC from the phantom study. For each tilt, the sinograms were averaged over all phi angles and the radial profile was plotted over the central axial bin. (A) shows the sinogram profiles for CTAC, (B) shows the sinogram profiles for MRAC<sub>2class</sub> and (C) shows the sinogram profiles for MRAC<sub>3class</sub>. The red line denotes randoms-corrected emission

sinogram, the black line denotes transmission mask boundaries, while the green and blue lines denote SSS and MCSSS scatter correction sinograms for each algorithm, respectively. Only a small difference can be detected between the scatter sinograms regardless of the attenuation correction method. The smallest difference is achieved when using CTAC.

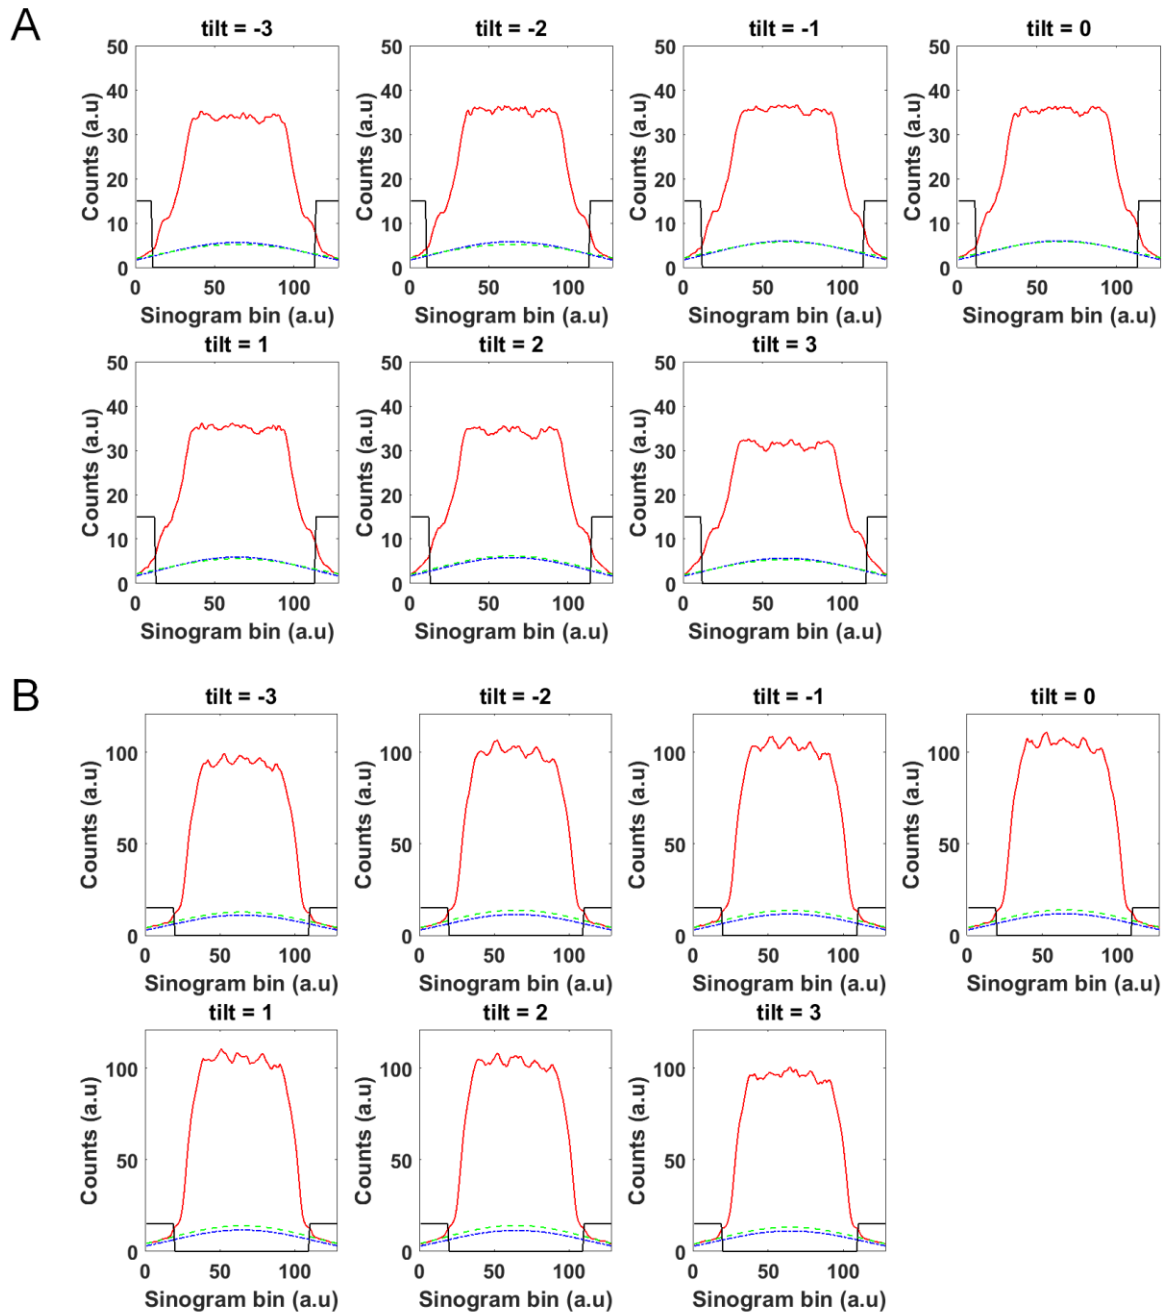

**SUPPLEMENTAL FIGURE 2.** Sinogram profiles from two clinical subjects (cases 4 and 1) presenting the smallest (A) and largest (B) detected difference between SSS and MCSSS algorithms with CTAC reconstructed PET data. Each individual tilt angle (N=7, from -3 to 3) is presented in a subplot. The sinograms were averaged over all phi angles and the radial profile was plotted over the central axial bin. (A) shows the sinogram profiles for the best case (smallest difference between SSS and MCSSS) subject and (B) shows the sinogram profiles for the worst case (largest difference between SSS and MCSSS) subject. In (B), MCSSS shows a poorer fit compared to SSS. The red line denotes randoms-corrected emission sinogram, the black line denotes transmission mask boundaries, while the green and blue lines denote SSS and MCSSS scatter correction sinograms for each algorithm, respectively.

**A**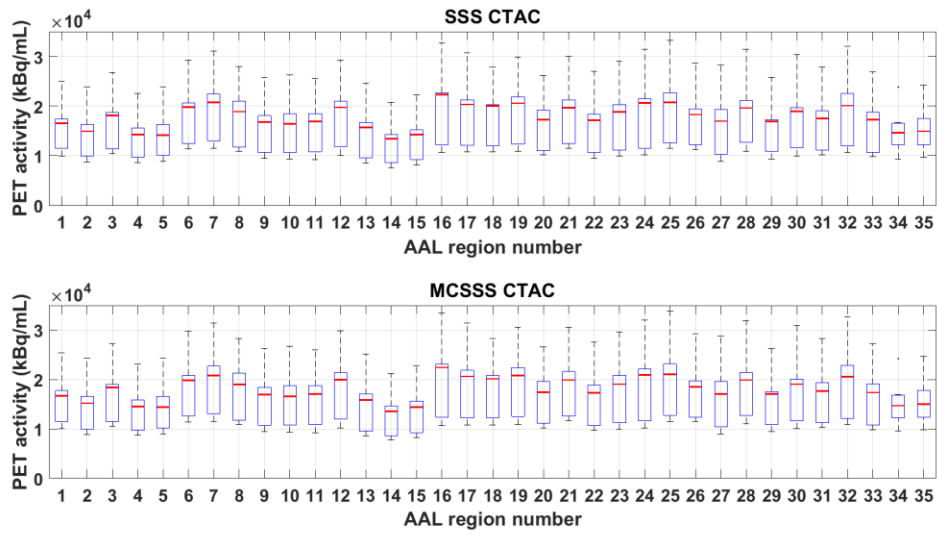**B**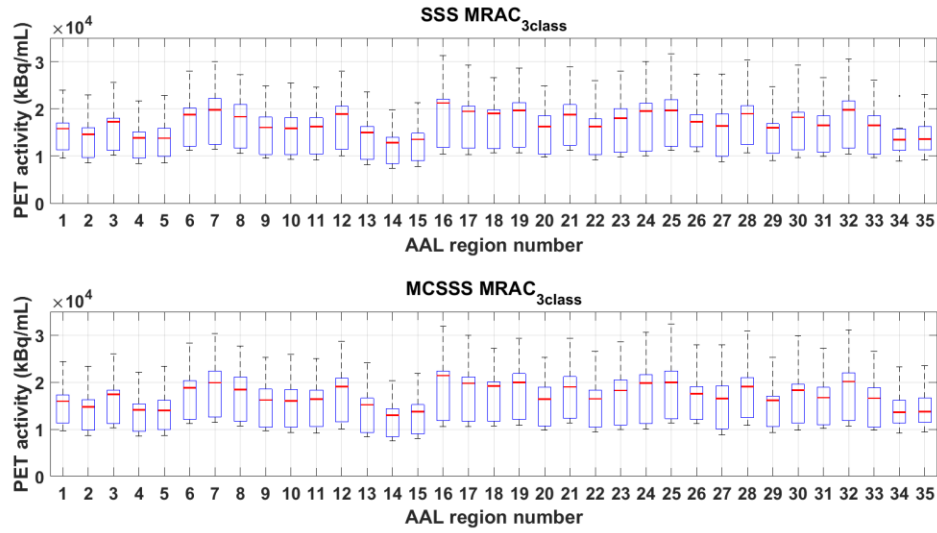**C**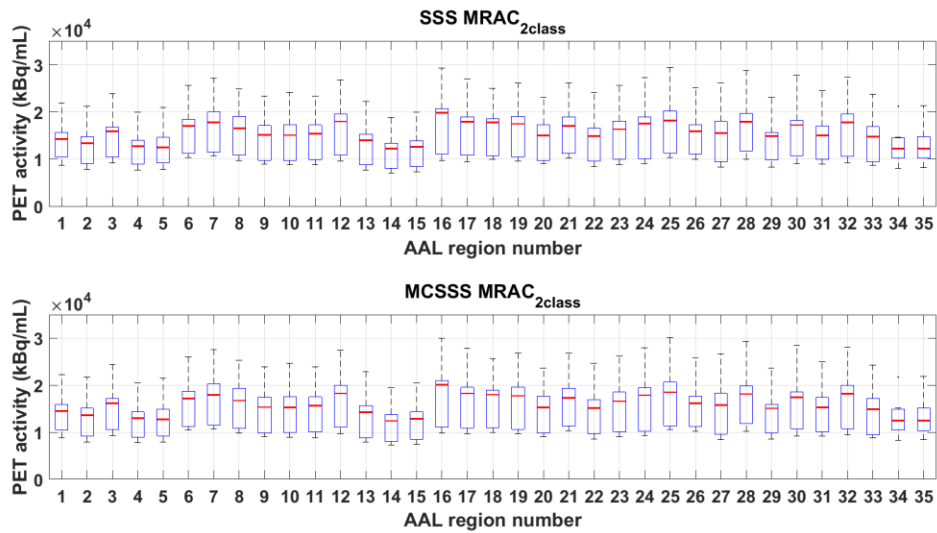

**SUPPLEMENTAL FIGURE 3.** Boxplots of individual VOI (35 VOI over 7 patients) with both scatter correction methods using CTAC (A), MRAC<sub>2class</sub> (B) and MRAC<sub>3class</sub> (C). The red line denotes the median activity, the edges of the box are the 25th and 75th percentiles, the whiskers denote the minimum and maximum activity, while individual outliers are defined by a black dot. MCSSS results in slightly higher activity compared to SSS, although the differences between MCSSS and SSS are small regardless of the attenuation correction method.

**SUPPLEMENTAL TABLE 1.**

**Anatomical region numbers and their corresponding names as given in the AAL atlas.**

| <b>Region Number</b> | <b>Region name</b>          | <b>Region Number</b> | <b>Region name</b> |
|----------------------|-----------------------------|----------------------|--------------------|
| 1                    | Precentral                  | 18                   | Lingual            |
| 2                    | Rolandic_Oper               | 19                   | Occipital          |
| 3                    | Supp_Motor_Area             | 20                   | Fusiform           |
| 4                    | Olfactory                   | 21                   | Postcentral        |
| 5                    | (Region not named)          | 22                   | SupraMarginal      |
| 6                    | Frontal_Sup                 | 23                   | Angular            |
| 7                    | Frontal_Mied                | 24                   | Precuneus          |
| 8                    | Frontal_Inf                 | 25                   | Paracentral_Lobule |
|                      |                             |                      |                    |
| 9                    | Rectus                      | 26                   | Caudate            |
| 10                   | Insula                      | 27                   | Putamen            |
| 11                   | Cingulum_Ant                | 28                   | Pallidum           |
| 12                   | Cingulum_Mid                | 29                   | Thalamus           |
| 13                   | Cingulum_Post               | 30                   | Heschl             |
| 14                   | Hippocampus/ParaHippocampal | 31                   | Parietal           |
| 15                   | Amygdala                    | 32                   | Temporal           |
| 16                   | Calcarine                   | 33                   | Vermis             |
| 17                   | Cuneus                      | 34                   | Cerebellum_Crus    |
|                      |                             | 35                   | Cerebellum         |
